# Supplementary material for: Transition metal ion-coordinated porous organic polymer to enhance the peroxidase mimic activity for detection of ascorbic acid and dopamine
Source: Royal Society of Chemistry journal article supplement (doi:10.1039/d1ma01195b), 2022-01-01
Supplement: d1ma01195b1.pdf [file d1ma01195b1.pdf]

Electronic supporting information

**Transition Metal ions coordinated porous organic polymer to Enhance the  
of Peroxidase for Detection of Ascorbic acid and Dopamine**

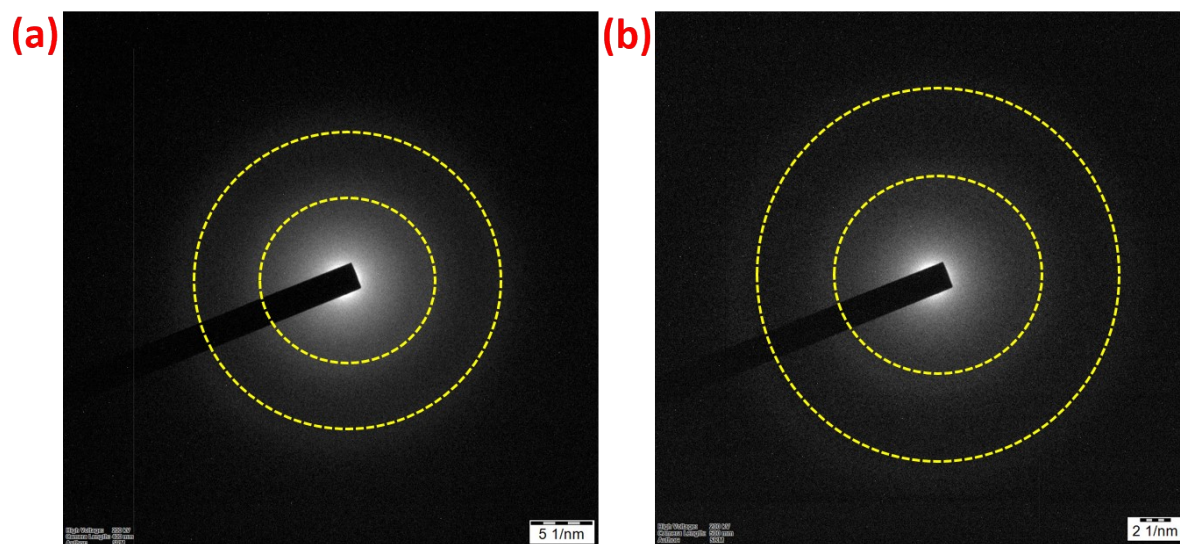

Fig.S1 TEM-SAD pattern for POP and  $\text{Cu}^{2+}$ @POP.

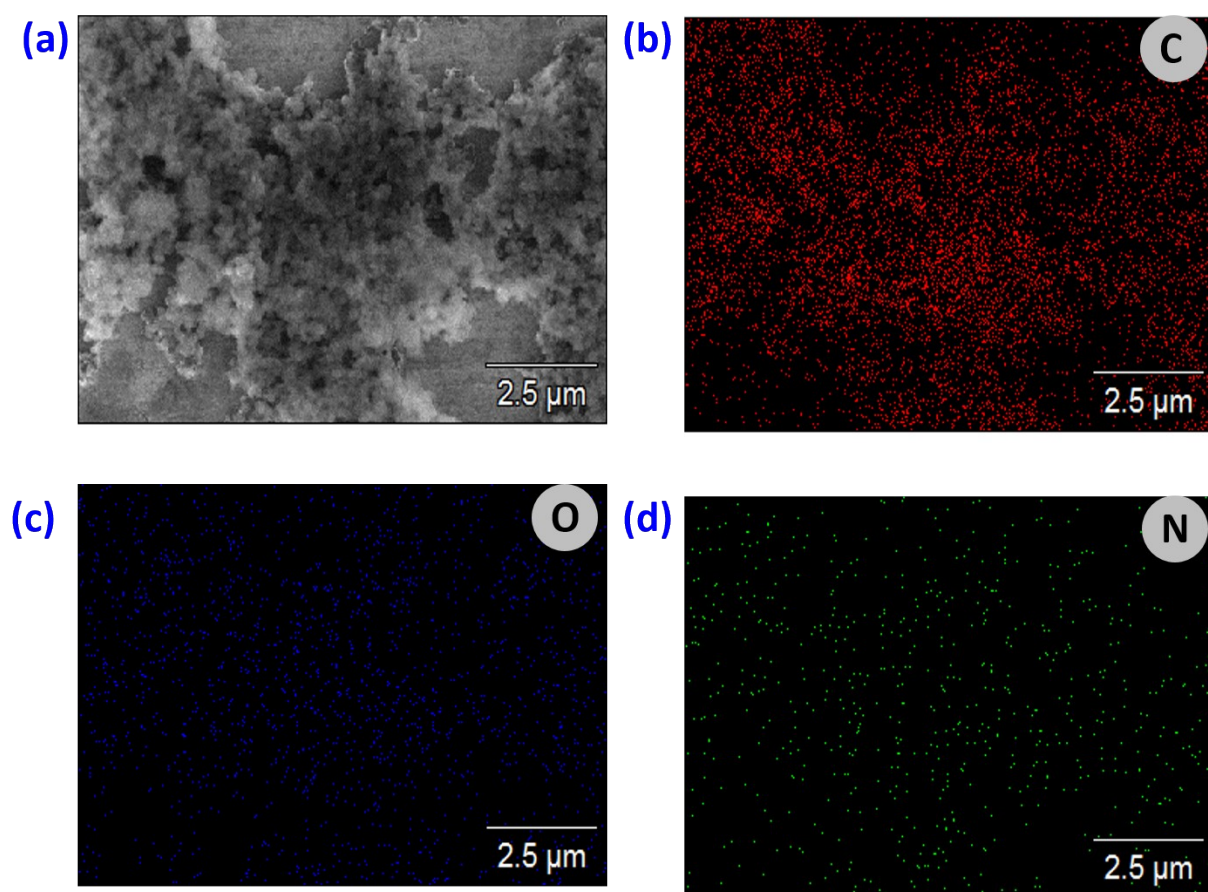

Fig.S2 SEM image and SEM-Mapping of POP.

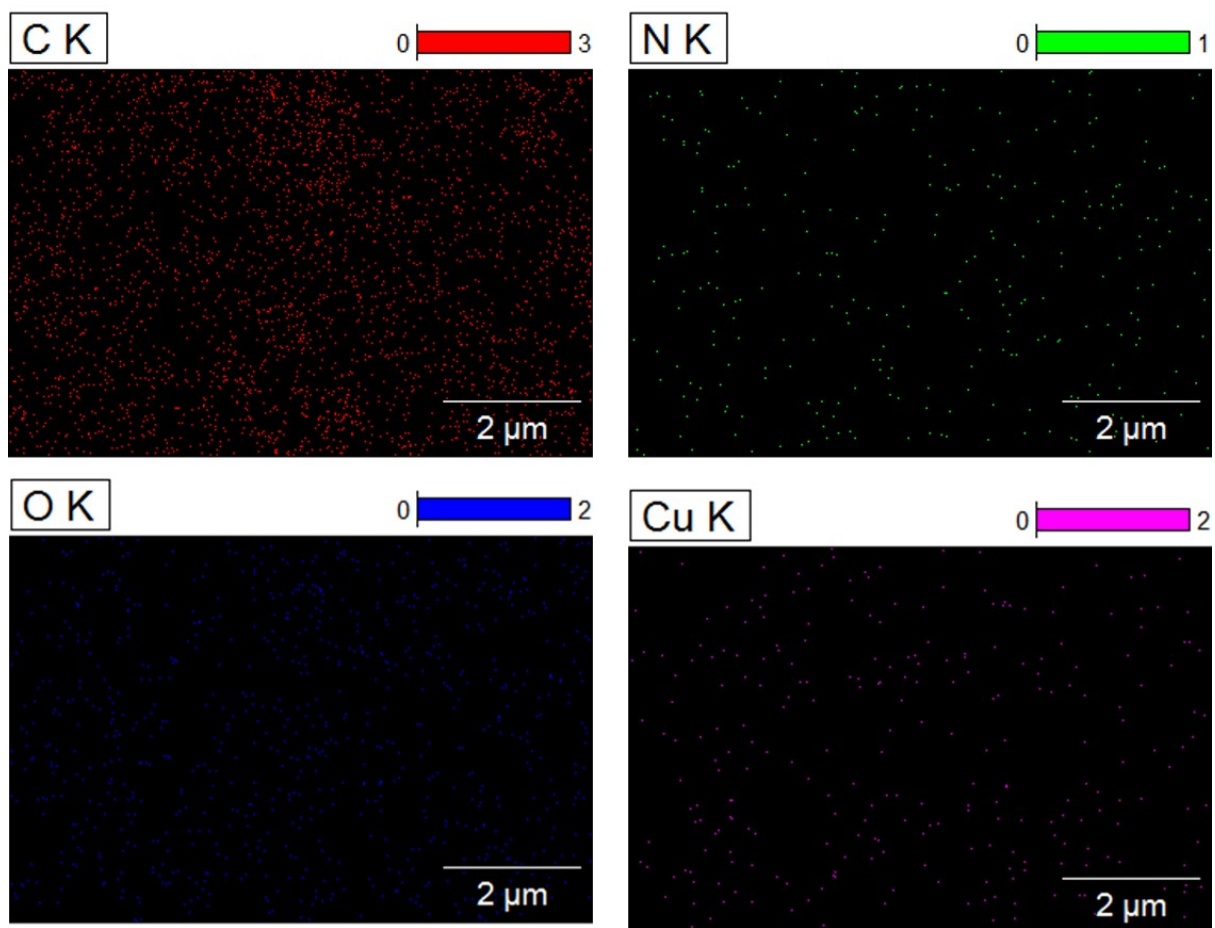

Fig.S3 SEM-Mapping analysis for Cu<sup>2+</sup>@POP.

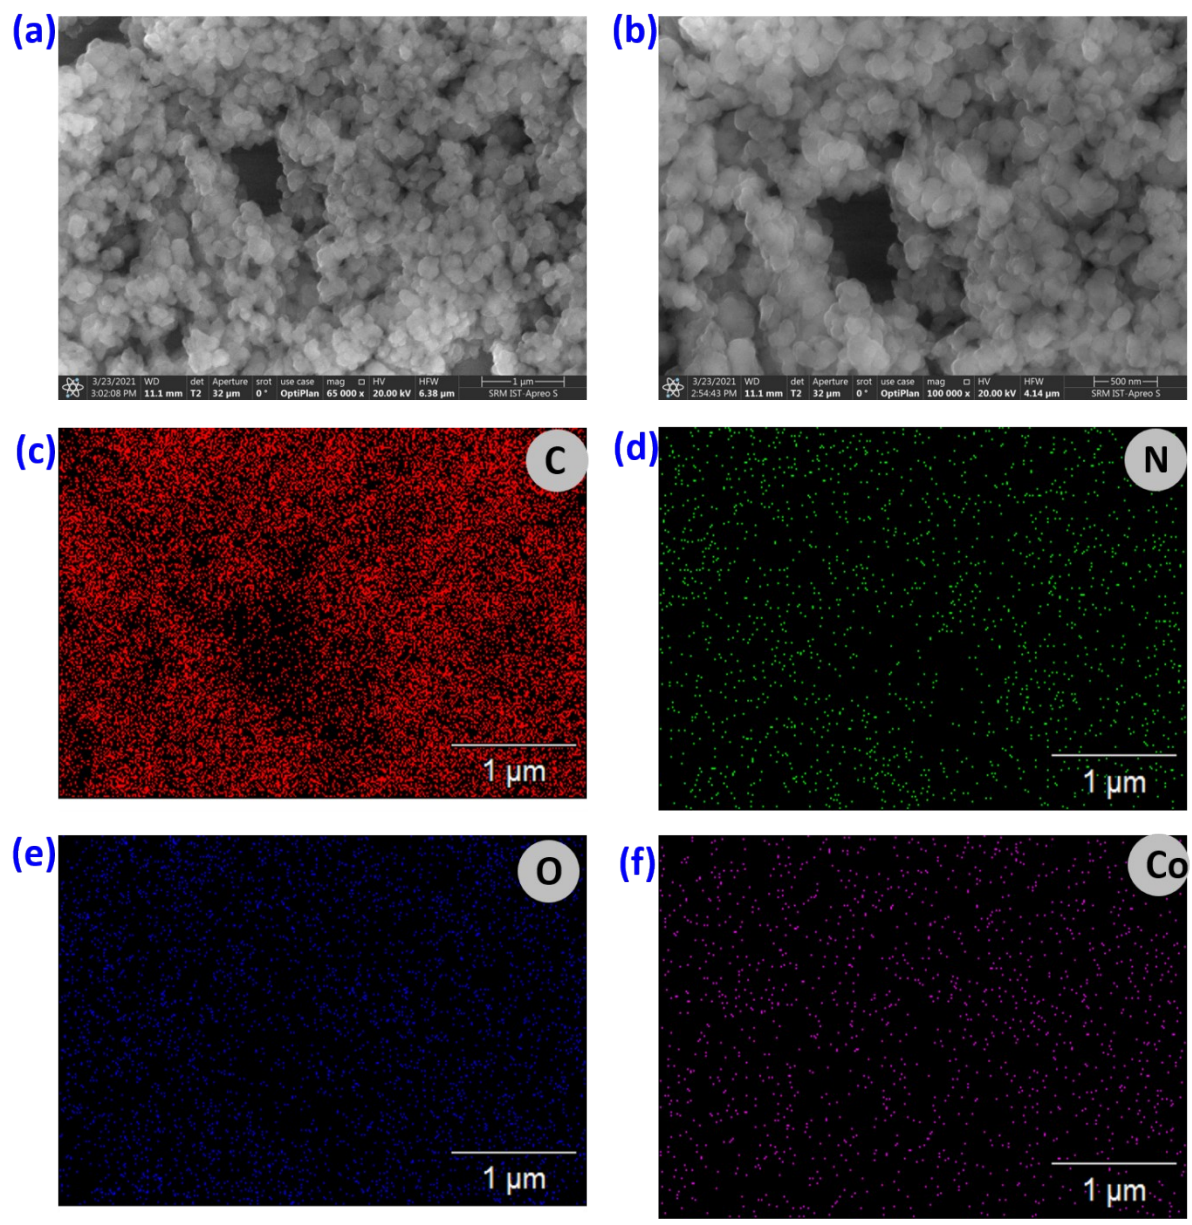

Fig.S4 SEM image and SEM-Mapping of Co<sup>2+</sup>@POP.

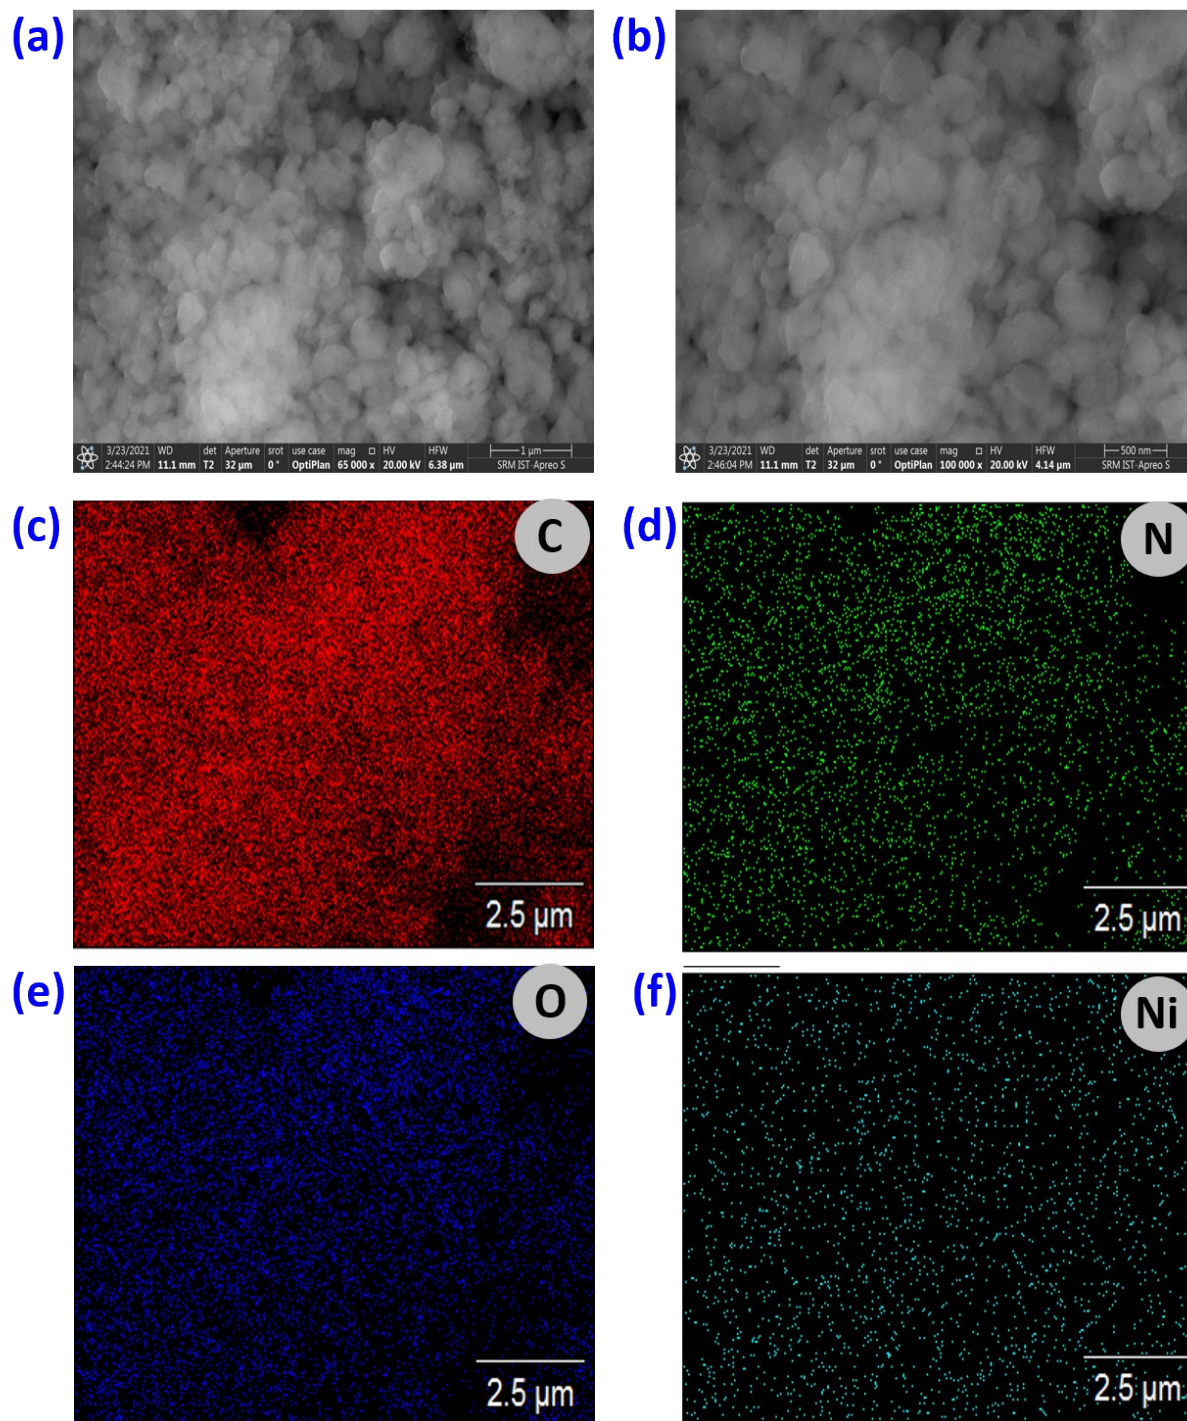

Fig.S5 SEM image and SEM-Mapping of  $\text{Ni}^{2+}@POP$ .

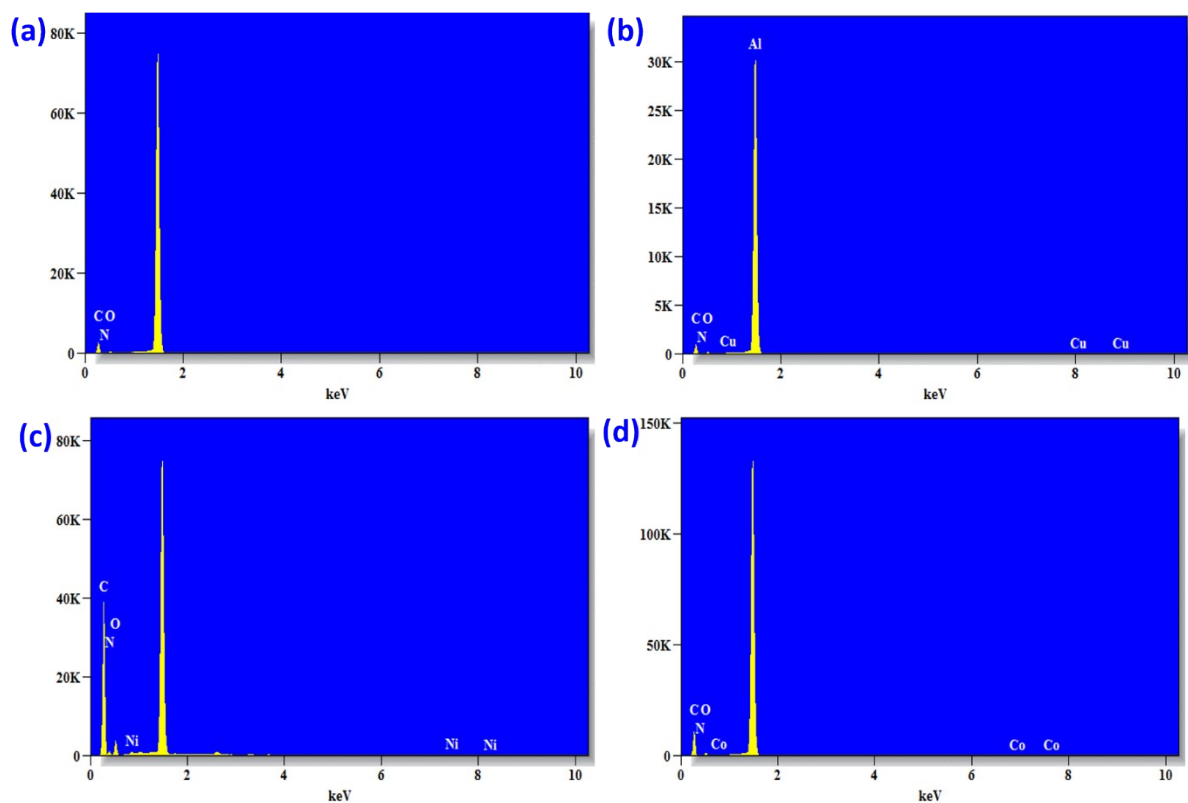

Fig.S7 EDX spectra of POP,  $\text{Cu}^{2+}$ @POP,  $\text{Ni}^{2+}$ @POP and  $\text{Co}^{2+}$ @POP.

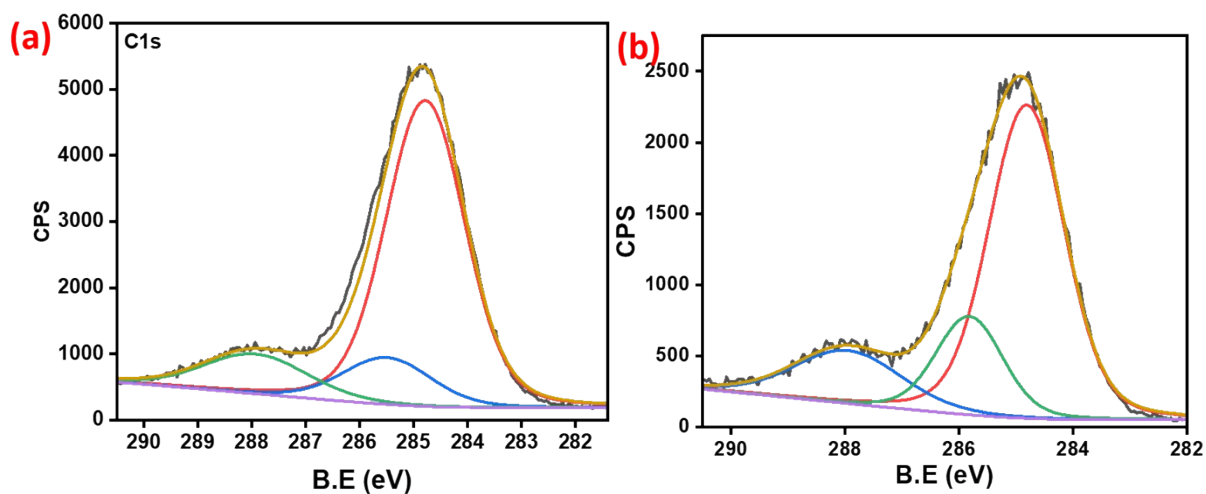

Fig.S3 C1s spectra of POP and  $\text{Cu}^{2+}$ @POP.

Michaelis-Menten kinetics equation

The Michaelis-Menten kinetics equation is  $V = (V_{max} \times [S]) / (K_m + [S])$ . Lineweaver-Burk double reciprocal plot is expressed as:  $1/V = (V_{max} / K_m) (1/[S]) + (V_{max} / 1)$ . Where, Michaelis-Menten constant ( $K_m$ ), maximum velocity ( $V_{max}$ ), and substrate concentration ( $S$ ). The value  $K_m$  is important factor to find catalytic activity and affinity between enzyme and substrate, respectively.

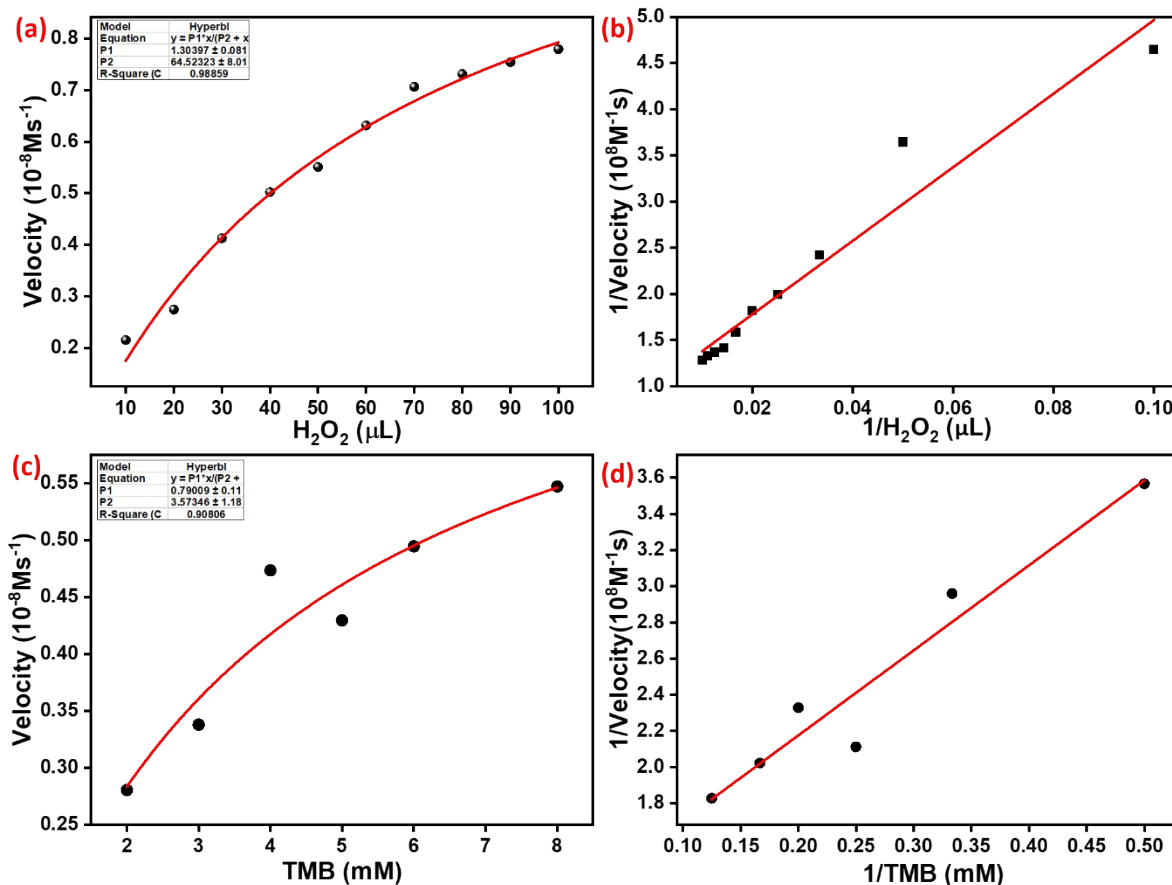

Fig.S8 EDX spectra of POP,  $\text{Cu}^{2+}$ @POP,  $\text{Ni}^{2+}$ @POP and  $\text{Co}^{2+}$ @POP.

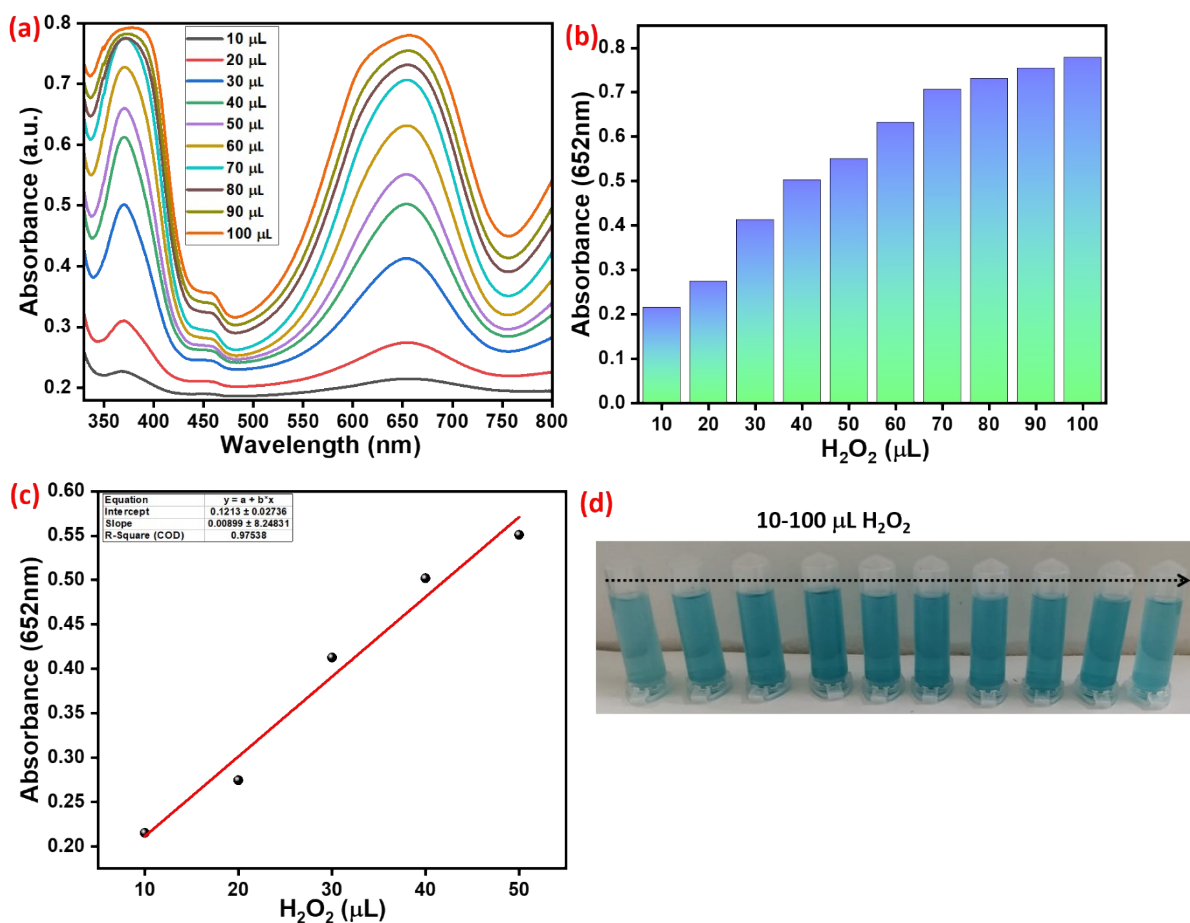

Fig.S9 (a) UV-Vis spectra for different concentrations of  $\text{H}_2\text{O}_2$ , (b) Absorbance suppress relative intensity was plot of absorbance band at 652 nm versus various concentration of  $\text{H}_2\text{O}_2$  (c) The linear calibration plot at different concentration of the  $\text{H}_2\text{O}_2$  in the reaction system and (d) inserted optical images shows different concentration of the  $\text{H}_2\text{O}_2$ .

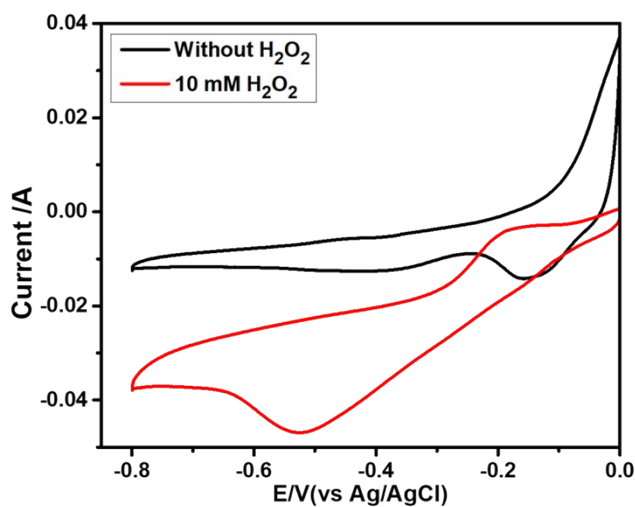

Fig. S10 Cyclic voltammetric curve of with and without  $\text{H}_2\text{O}_2$  in the presence of  $\text{Cu}^{2+}@POP$ .
